# Supplementary material for: Precise Position Control of Holonomic Inchworm Robot Using Four Optical Encoders
Source: MDPI journal article supplement (doi:10.3390/mi14020375), 2023-02-02
Supplement: s1 [file s1]

## Supporting Information

### Precise position control of holonomic inchworm robot using four optical encoders

K. Tanabe, M. Shiota, E. Kusui, Y. Iida, H. Kusama, R. Kinoshita, Y. Tsukui, R. Minegishi, Y. Sunohara, O. Fuchiwaki

**Table S1** Specification and score of the representative micromanipulation robots.

| Micromanipulations<br>(Score) | Dimension<br>[mm]                          | DoF                                 | Range<br>[mm, deg]                                                                    | Velocity<br>[mm/s] | Resolution<br>[nm] | Mass<br>[g] | Payload<br>[g] |
|-------------------------------|--------------------------------------------|-------------------------------------|---------------------------------------------------------------------------------------|--------------------|--------------------|-------------|----------------|
| Inchworm<br>(20)              | $86 \times 86 \times 15$<br>(3)            | $XY\theta_z$                        | $\infty \times \infty \times \infty$<br>(4)                                           | 6.5<br>(3)         | 10<br>(3)          | 100<br>(4)  | 1000<br>(3)    |
| USM<br>(20)                   | $55 \times 55 \times 14$<br>(4)            | $XY\theta_z$                        | $\infty \times \infty \times \infty$<br>(4)                                           | 31.5<br>(5)        | 5<br>(2)           | 145<br>(3)  | 300<br>(2)     |
| PER-Hexpod<br>(19)            | $68 \times 60 \times 59$<br>(2)            | $XYZ$<br>$\theta_x\theta_y\theta_z$ | $\infty \times \infty \times 0.018$<br>$\times 0.05 \times 0.03 \times \infty$<br>(5) | 1.89<br>(2)        | 4.53<br>(4)        | 450<br>(2)  | 10000<br>(4)   |
| miBot<br>(19)                 | $20.5 \times 21.7$<br>$\times 12.5$<br>(5) | $XYZ\theta_z$                       | $20 \times 20 \times 5.81 \times \infty$<br>(2)                                       | 1.5<br>(1)         | 0.02<br>(5)        | 6<br>(5)    | 6<br>(1)       |
| XY stage<br>(13)              | $345 \times 345$<br>$\times 110$<br>(1)    | XY                                  | $100 \times 100$<br>(1)                                                               | 10<br>(4)          | 1000<br>(1)        | 7600<br>(1) | 16000<br>(5)   |

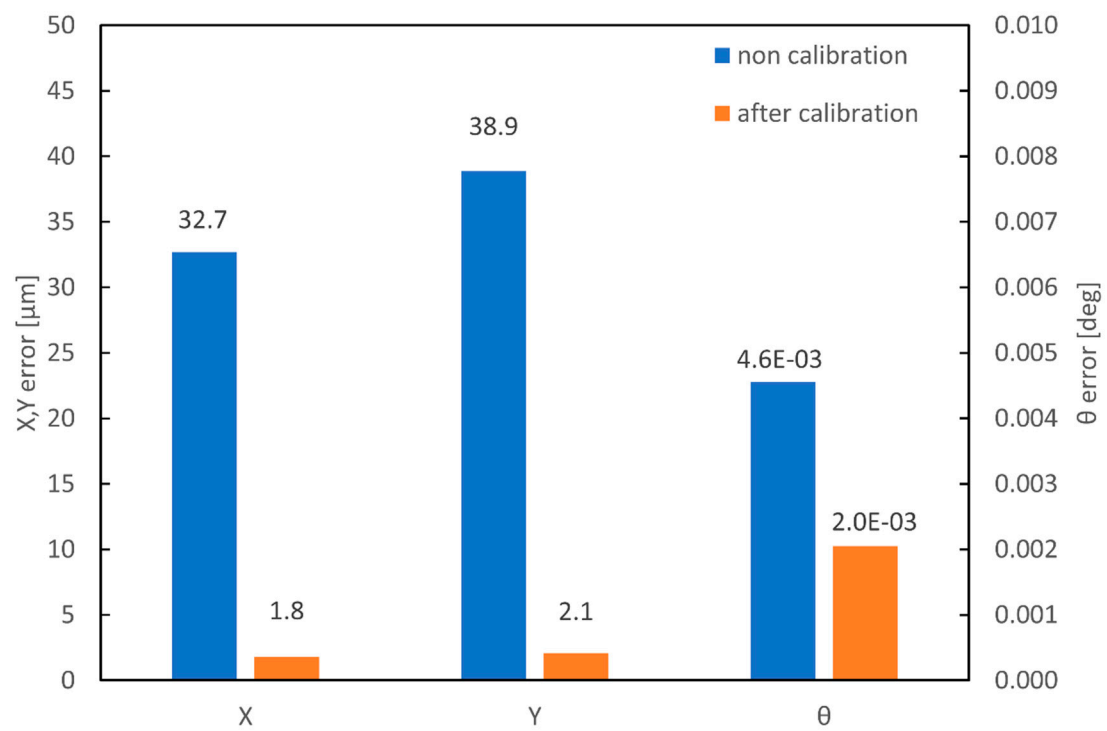

**Fig. S1** Plots of XY $\theta$ -axes errors vs. XY $\theta$ -axes simultaneous displacement for (X, Y,  $\theta$ ) = (4000 $\mu\text{m}$ , 4000 $\mu\text{m}$ , 5°)

Movie S1 3DOF motion of holonomic inchworm robot.

See attached movie
